# Supplementary material
Source: MDPI journal article supplement (https://www.mdpi.com/2073-4344/13/2/403)
Supplement: s1 [file s1]

## **Supplementary Materials**

# **Synthesis of hollow leaf-shaped iron-doped nickel–cobalt layered double hydroxides using two-dimensional (2D) zeolitic imidazolate framework catalyzing oxygen evolution reaction**

**Quoc Hao Nguyen <sup>1</sup>, Kyungmin Im <sup>1,\*</sup> and Jinsoo Kim <sup>1,\*</sup>**

<sup>1</sup>Department of Chemical Engineering (Integrated engineering), Kyung Hee University, 1732, Deogyong-daero, Giheung-gu, Yongin-si, Gyeonggi-do 17104, Republic of Korea

\* Correspondence: jkim21@khu.ac.kr (J.K.); catt917@khu.ac.kr (K.I.)

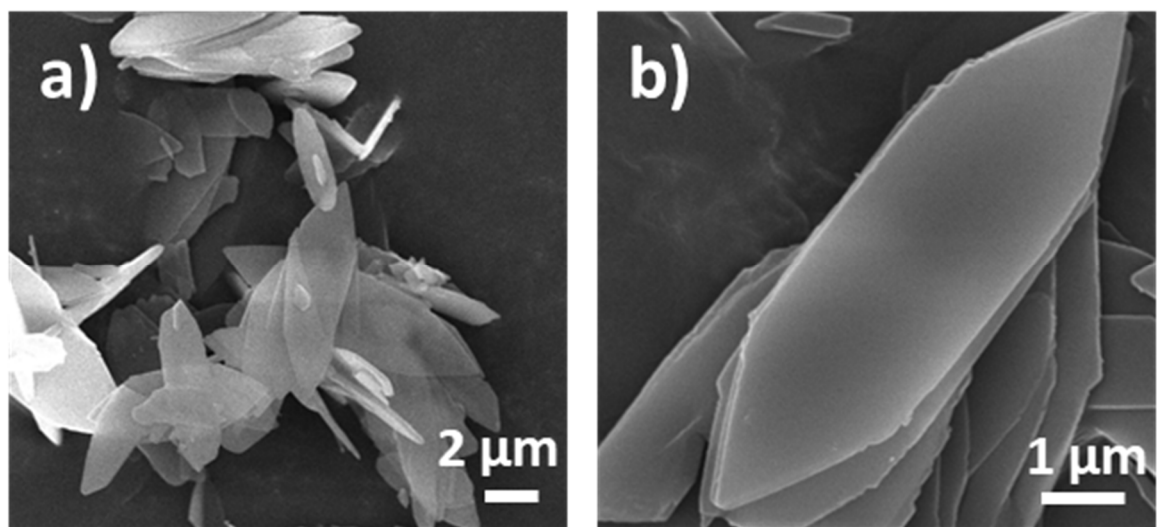

**Figure S1** (a,b) FE-SEM images of Co-ZIFL.

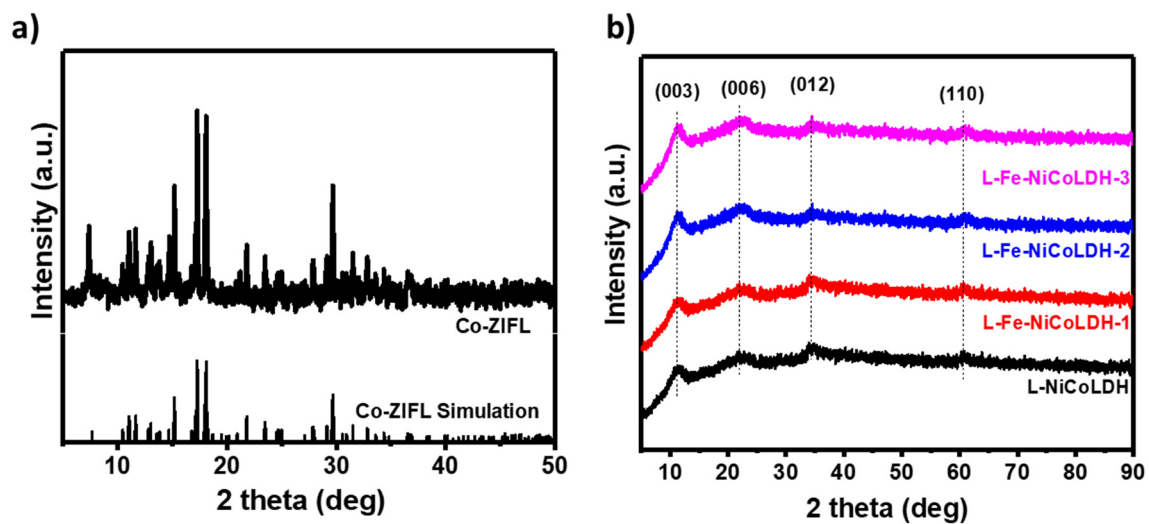

**Figure S2** Comparison of the XRD patterns of (a) Co-ZIFL and simulated Co-ZIFL patterns and (b) L-NiCoLDH and L-FeNiCoLDH-x.

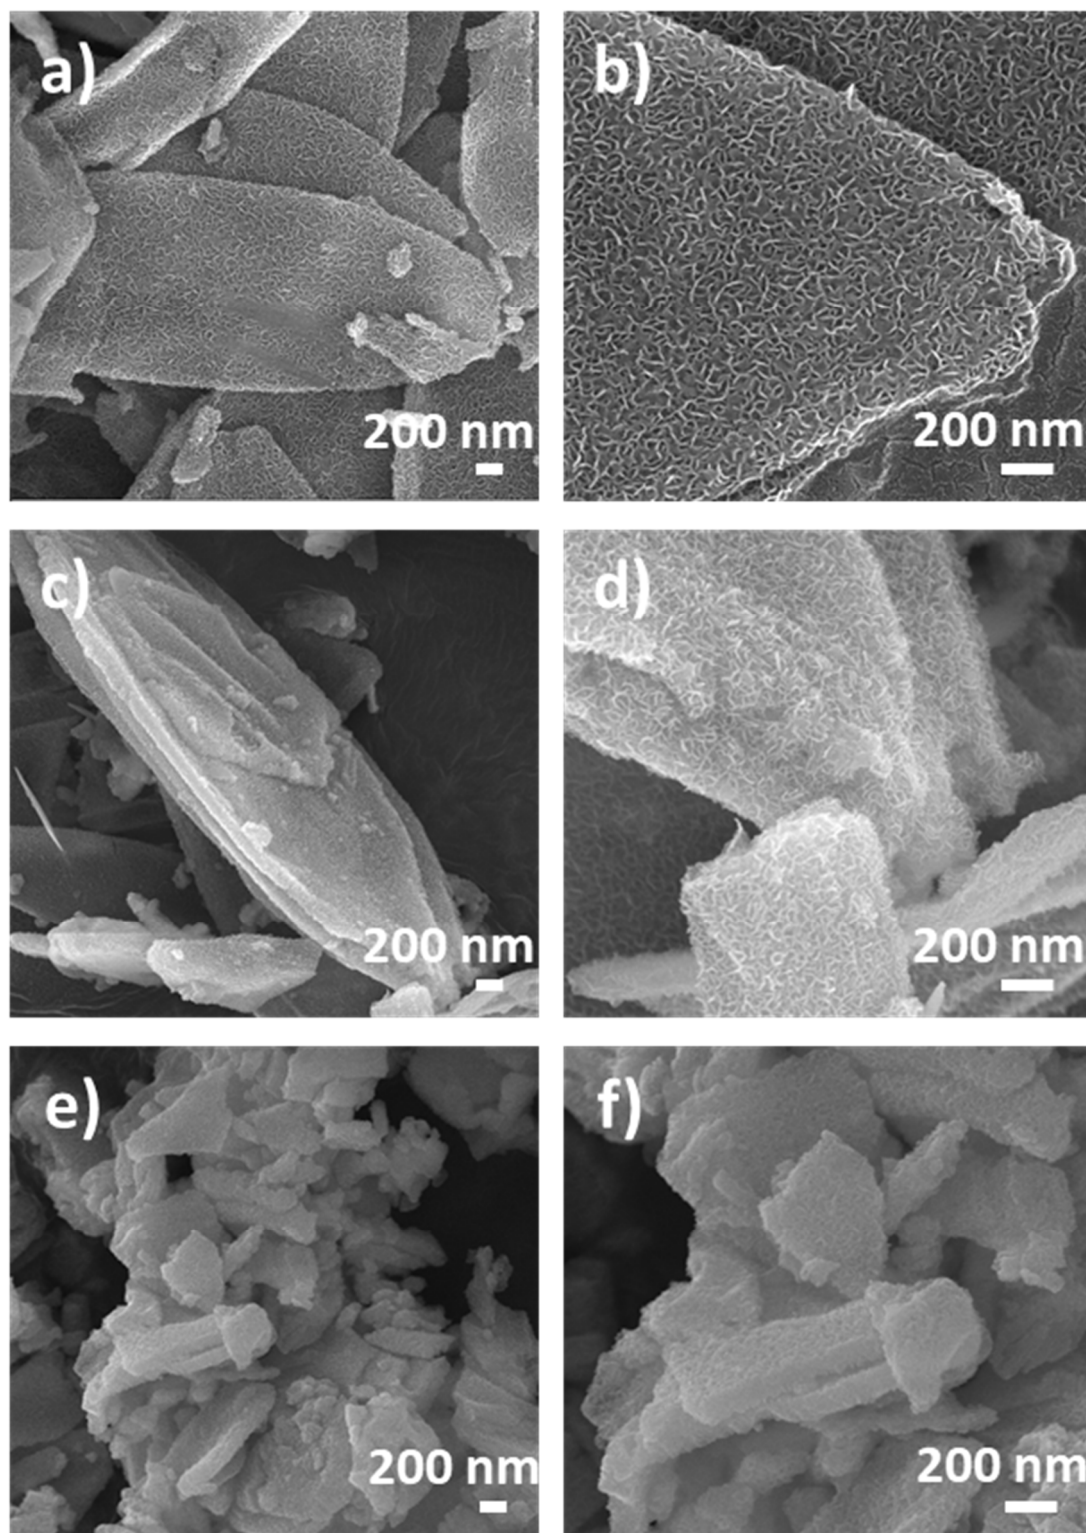

**Figure S3** SEM images of (a,b) L-NiCoLDH (c,d) L-Fe-NiCoLDH-1, and (e,f) L-Fe-NiCoLDH-3 from Co-ZIFL.



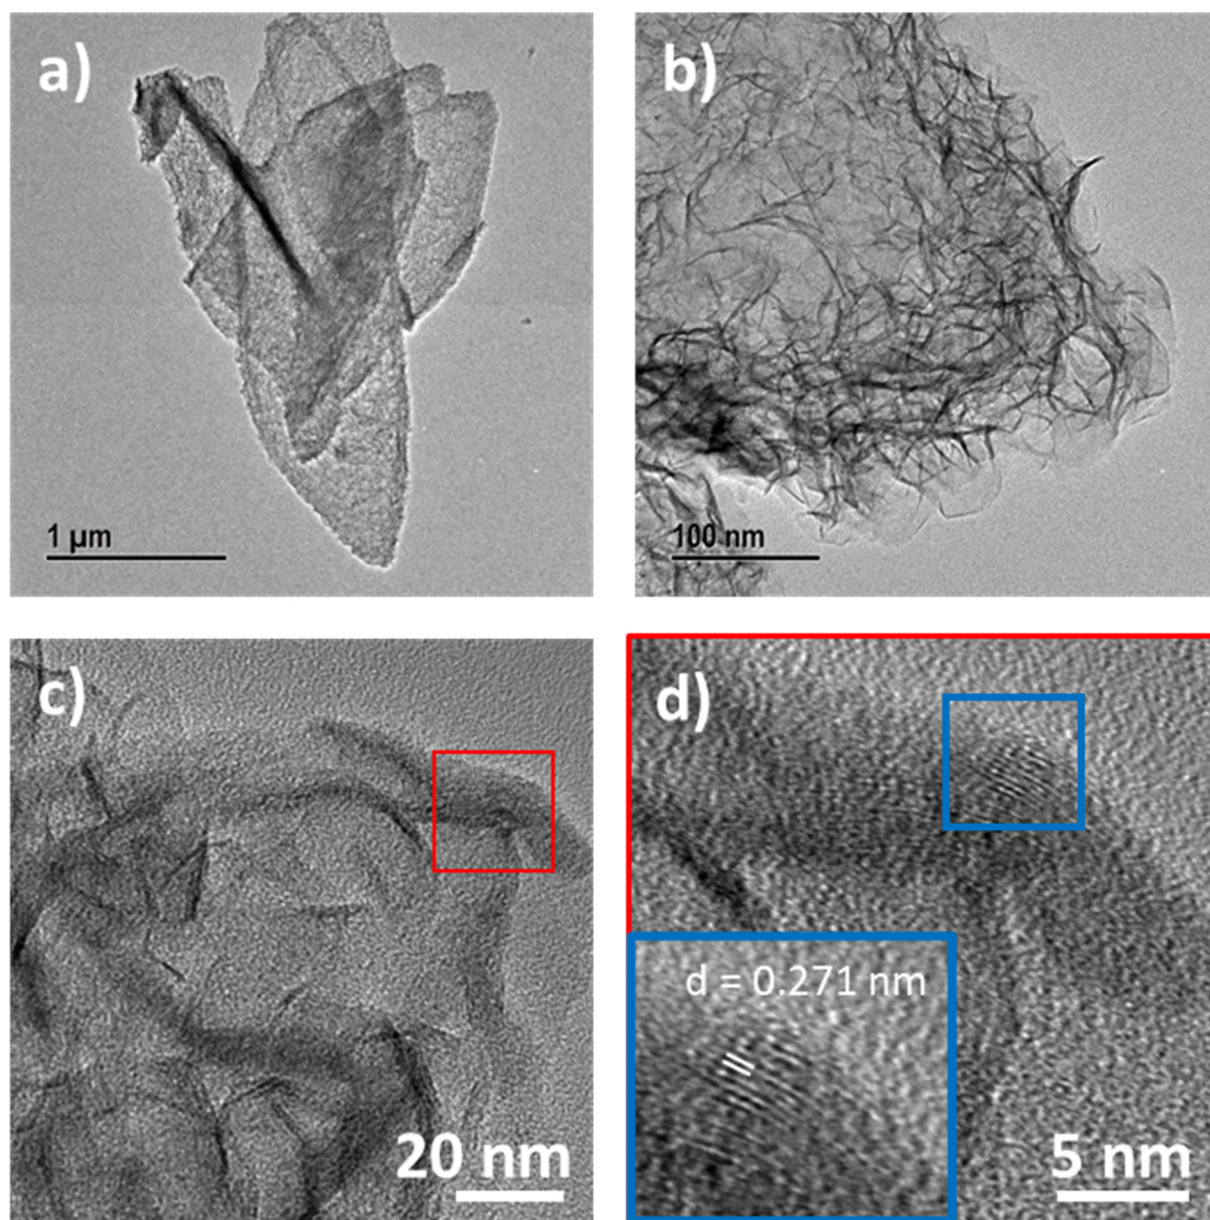

**Figure S4** (a–d) FE-TEM images of L-NiCoLDH obtained from Co-ZIFL.

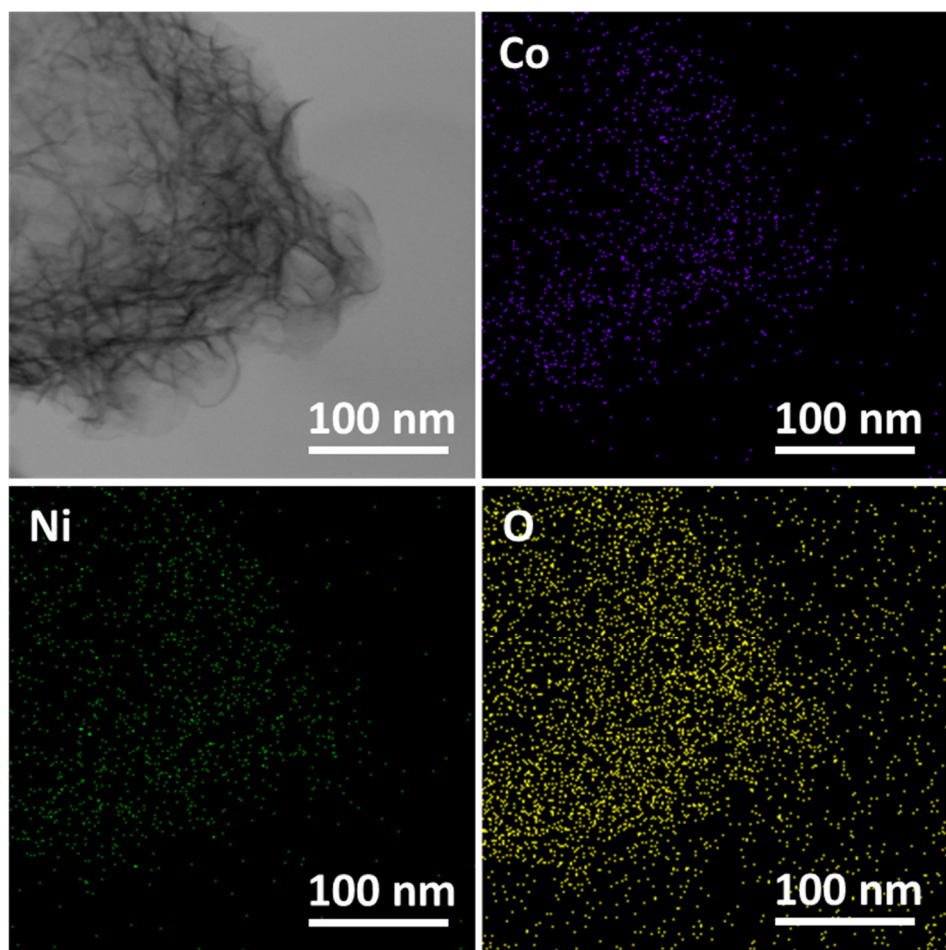

**Figure S5** EDX mapping of L-NiCoLDH obtained from Co-ZIFL.

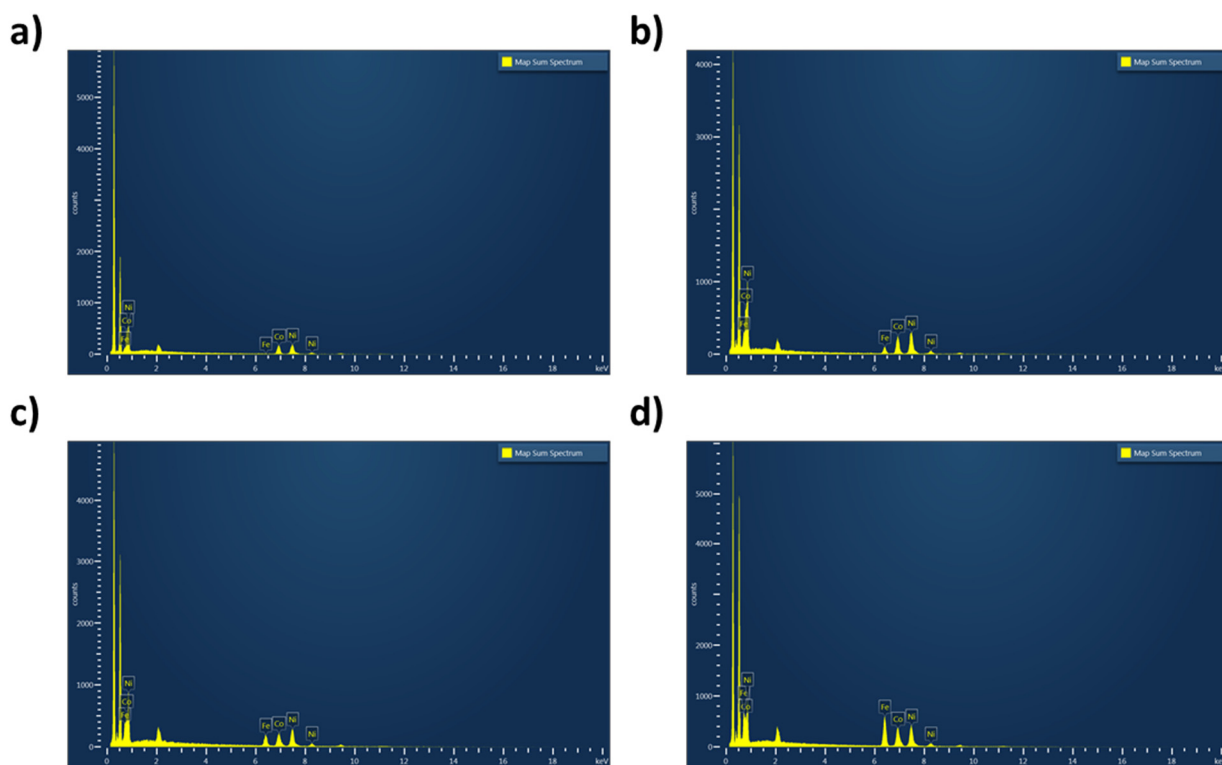

**Figure S6** EDX signals of (a) L-NiCoLDH, (b) L-Fe-NiCoLDH-1, (c) L-Fe-NiCoLDH-2, and (d) L-Fe-NiCoLDH-3.

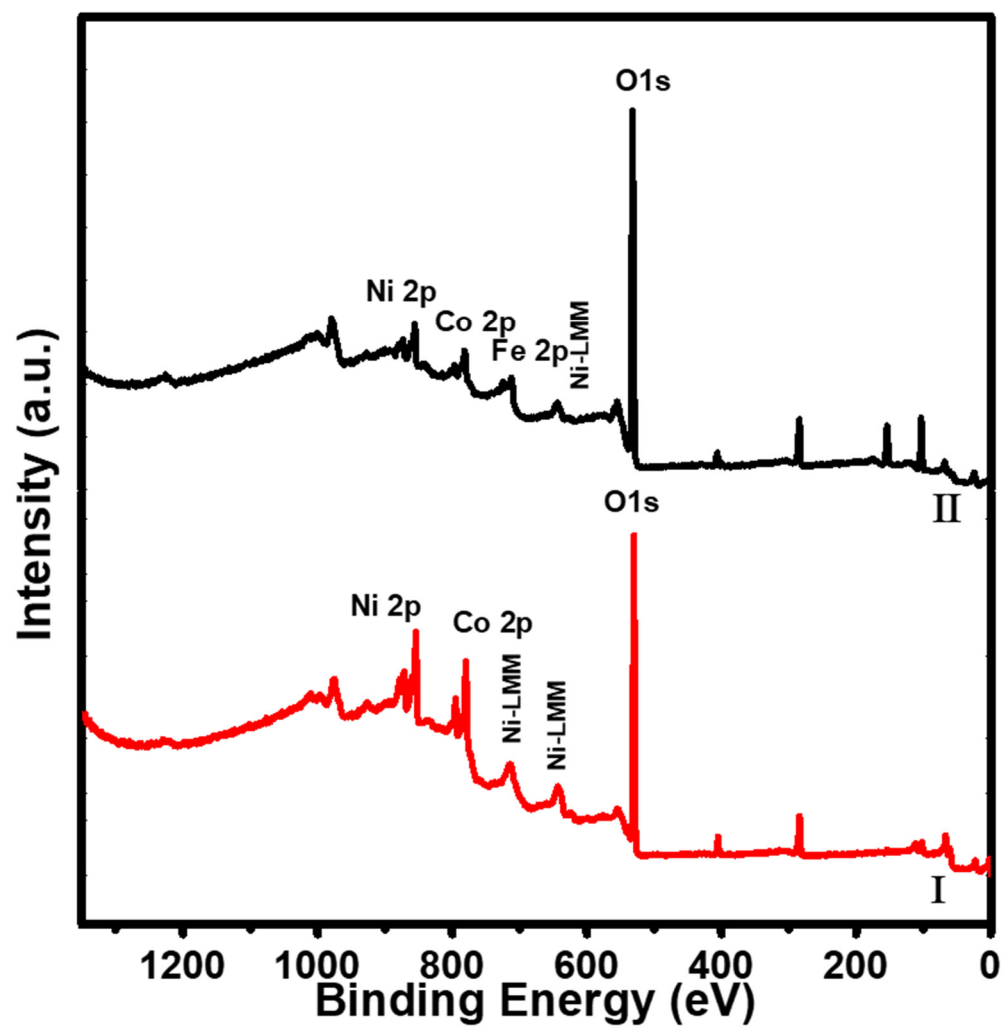

**Figure S7** XPS spectra of (I) L-NiCoLDH and (II) L-Fe-NiCoLDH-2.

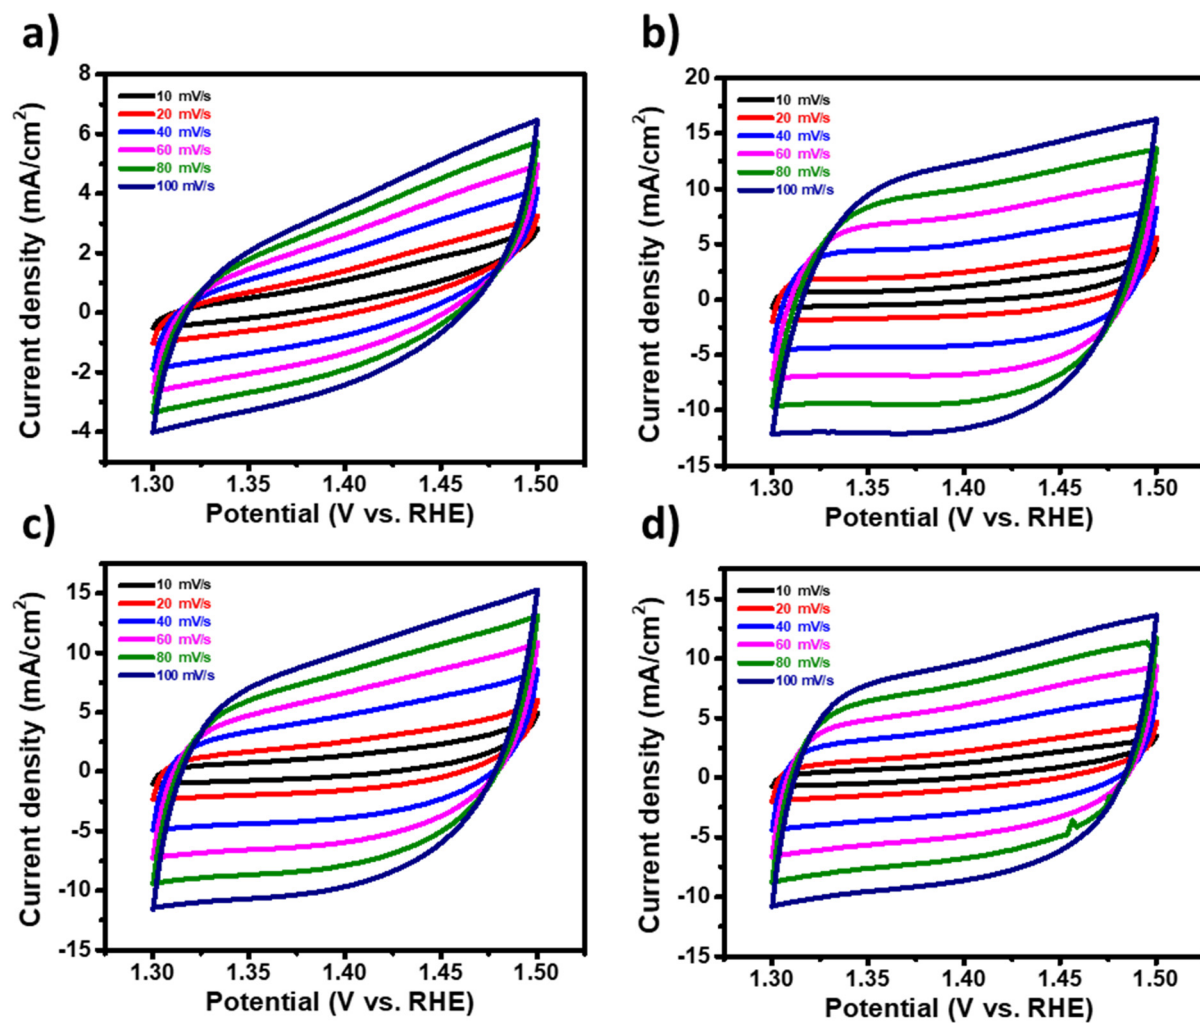

**Figure S8** CV diagrams (a) L-NiCoLDH, (b) L-Fe-NiCoLDH-1, (c) L-Fe-NiCoLDH-2, and (d) L-Fe-NiCoLDH-3 in 1.0 M KOH within the range of 1.3–1.5 V vs. RHE at 10, 20, 40, 60, 80 and 100 mV s<sup>-1</sup>, respectively.



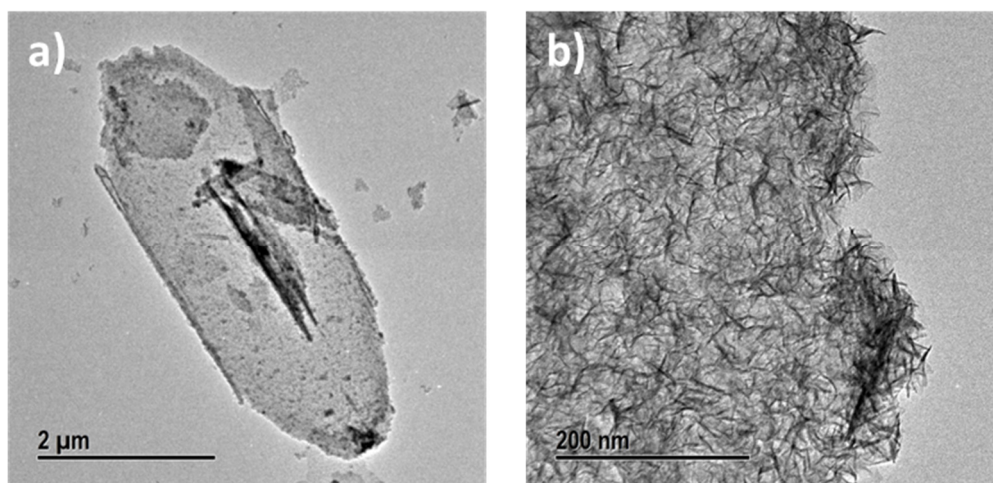

**Figure S9** (a,b) FE-TEM image of L-Fe-NiCoLDH-2 after stability test.

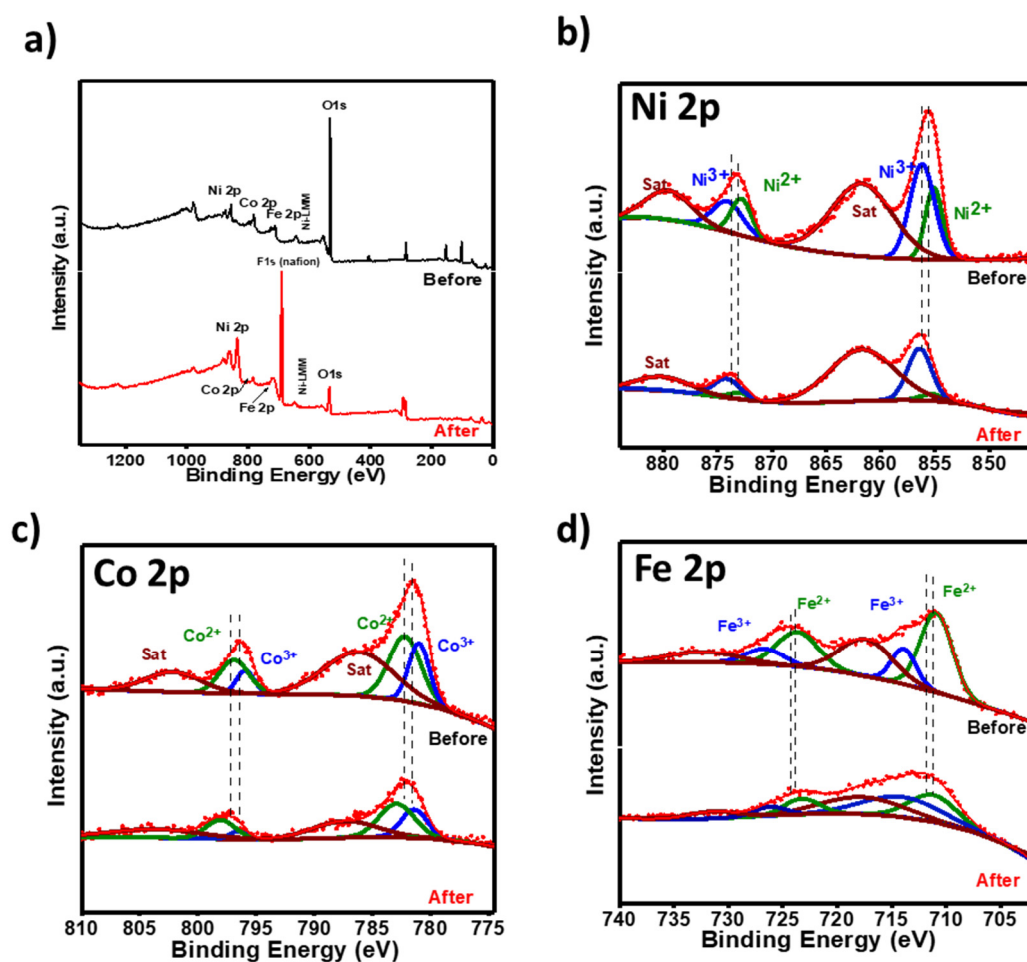

**Figure S10** XPS data of L-Fe-NiCoLDH-2 after stability test (a) XPS spectra, (b) Ni 2p (c) Co 2p, (d) Fe 2p.

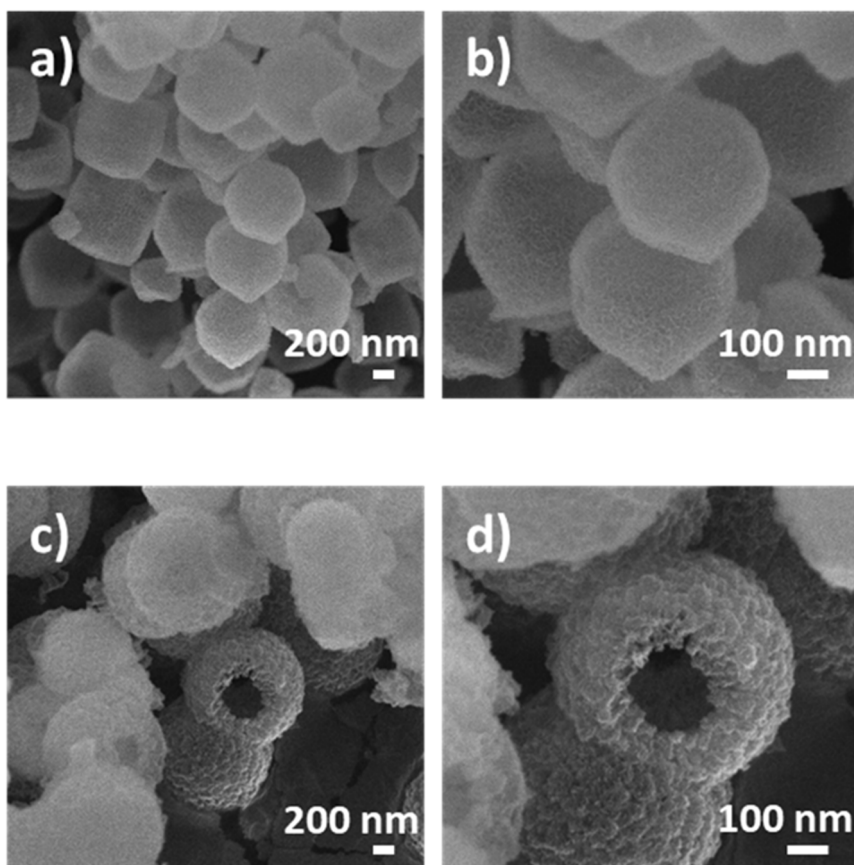

**Figure S11** SEM images of (a,b) P-Fe-NiCoLDH from the P-ZIF-67, and (c,d) S-Fe-NiCoLDH from the S-ZIF-67.

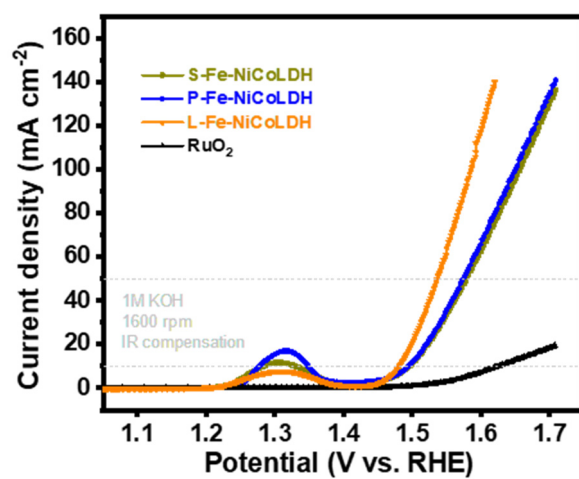

**Figure S12** OER performance of P-Fe-NiCoLDH, S-Fe-NiCoLDH, and L-Fe-NiCoLDH.

**Table S1.** Summary of the EDX elemental analysis of the catalysts.

| Sample         | Element |       |       |
|----------------|---------|-------|-------|
|                | Ni      | Co    | Fe    |
| L-NiCoLDH      | 55.58   | 44.42 | ---   |
| L-Fe-NiCoLDH-1 | 53.93   | 35.99 | 10.08 |
| L-Fe-NiCoLDH-2 | 51.27   | 29.05 | 19.67 |
| L-Fe-NiCoLDH-3 | 45.55   | 27.21 | 27.24 |

**Table S2.** Surface atomic concentrations of elements collected from the XPS spectra of L-Fe-NiCoLDH-2 and L-NiCoLDH.

| Name  | L-NiCoLDH | L-Fe-NiCoLDH-2 |
|-------|-----------|----------------|
| O 1s  | 74.17     | 82.23          |
| Fe 2p | ---       | 6.81           |
| Co 2p | 11.27     | 4.73           |
| Ni 2p | 14.56     | 6.23           |
